# Supplementary material for: Investigating the feasibility of scale up and automation of human induced pluripotent stem cells cultured in aggregates in feeder free conditions
Source: PubMed Central journal article supplement (PMC3969287; doi:10.1016/j.jbiotec.2013.12.009), 2014-03-10
Supplement: mmc1.pdf [file mmc1.pdf]

| <b>Lineage</b>       | <b>Duration</b> | <b>Basal media</b> | <b>Cytokine</b> | <b>Concentration</b> |
|----------------------|-----------------|--------------------|-----------------|----------------------|
| <b>Endoderm</b>      | Day 1           | CDM-PVA            | Activin-A       | 100 ng/mL            |
|                      |                 |                    | FGF-2           | 80 ng/mL             |
|                      |                 |                    | BMP4            | 10 ng/mL             |
|                      |                 |                    | LY29004         | 10 $\mu$ M           |
|                      |                 |                    | CHIR99021       | 3 $\mu$ M            |
|                      | Day 2           | CDM-PVA            | Activin-A       | 100 ng/mL            |
|                      |                 |                    | FGF-2           | 80 ng/mL             |
|                      |                 |                    | BMP4            | 10 ng/mL             |
|                      |                 |                    | LY29004         | 10 $\mu$ M           |
| Day 3                | RPMI-B27        | Activin-A          | 100 ng/mL       |                      |
|                      |                 | FGF-2              | 80 ng/mL        |                      |
| <b>Mesoderm</b>      | 3 days          | CDM-PVA            | Activin-A       | 100 ng/mL            |
|                      |                 |                    | FGF-2           | 20 ng/mL             |
|                      |                 |                    | BMP4            | 10 ng/mL             |
|                      |                 |                    | LY29004         | 10 $\mu$ M           |
|                      |                 |                    | CHIR99021       | 5 $\mu$ M            |
| <b>Neuroectoderm</b> | 11-12 days      | CDM-PVA            | FGF-2           | 12 ng/mL             |
|                      |                 |                    | SB431542        | 10 $\mu$ M           |
|                      |                 |                    | Noggin          | 150 ng/mL            |
|                      |                 |                    | SB431542        | 10 $\mu$ M           |
